# Supplementary material
Source: PubMed Central journal article supplement (PMC8561704)
Supplement: NIHMS1638963-supplement-supplemental_material.pdf [file NIHMS1638963-supplement-supplemental_material.pdf]

| Cone type | OS length<br>( $\mu\text{m}$ ) | OS base<br>( $\mu\text{m}$ ) | OS tip<br>( $\mu\text{m}$ ) | OS volume<br>( $\mu\text{m}^3$ ) | OS Surf. Area<br>( $\mu\text{m}^2$ ) | $A_e$<br>( $\mu\text{m}^2$ )  |
|-----------|--------------------------------|------------------------------|-----------------------------|----------------------------------|--------------------------------------|-------------------------------|
| L cones   | 16.1 $\pm$ 1.7<br>(n = 19)     | 5.1 $\pm$ 0.9<br>(n = 19)    | 2.7 $\pm$ 0.4<br>(n = 19)   | 202 $\pm$ 57<br>(n = 19)         | 198 $\pm$ 35<br>(n = 19)             | 1.93 $\pm$ 0.52<br>(n = 19)   |
| M cones   | 14.6 $\pm$ 1.8<br>(n = 21)     | 4.4 $\pm$ 0.5**<br>(n = 21)  | 2.6 $\pm$ 0.5<br>(n = 21)   | 143 $\pm$ 37**<br>(n = 21)       | 159 $\pm$ 27**<br>(n = 21)           | 1.37 $\pm$ 0.46**<br>(n = 21) |
| S cones   | 10.7 $\pm$ 0.9**<br>(n = 20)   | 5.5 $\pm$ 0.9<br>(n = 20)    | 3.3 $\pm$ 0.4**<br>(n = 20) | 172 $\pm$ 49<br>(n = 20)         | 149 $\pm$ 27**<br>(n = 20)           | 1.65 $\pm$ 0.58<br>(n = 20)   |
| Rods      | 30.3 $\pm$ 2.7<br>(n = 20)     | 2.3 $\pm$ 2.2<br>(n = 20)    | 2.3 $\pm$ 2.2<br>(n = 20)   | 54 $\pm$ 4<br>(n = 20)           | 215 $\pm$ 27<br>(n = 20)             | 0.66 $\pm$ 0.09<br>(n = 20)   |

**Table S1. Physical dimensions of goldfish photoreceptors, Related to Figures 2, 3, and 5.**

Values are mean  $\pm$  SD, with the number of cells analyzed (n) in parentheses.  $A_e$  is the effective collecting area calculated as  $A_e = V \times 2.303 \times \alpha_\lambda \times Q \times f$ , where V is the outer-segment volume,  $\alpha_\lambda$  is the axial pigment density (0.0124 for goldfish cones [S1] and 0.0161 for rods [S2]), Q is the quantum efficiency of isomerization (0.67 [S3]), and f is a polarization factor to account for the orientation of the chromophore ( $\sim 0.5$  for unpolarized light, [S4]). \*\* symbols indicate statistically-significant differences compared to one or both of the other cone types ( $p < 0.0001$ ). Rods were not included in statistical analyses.

## SUPPLEMENTAL REFERENCES

- S1. Hárosi, F.I., and MacNichol, E.F. (1974). Visual pigments of goldfish cones. Spectral properties and dichroism. *J. Gen. Physiol.* 63, 279–304. Available at: <http://www.ncbi.nlm.nih.gov/pubmed/4817352> [Accessed October 20, 2018].
- S2. Hárosi, F.I. (1975). Absorption spectra and linear dichroism of some amphibian photoreceptors. *J. Gen. Physiol.* 66, 357–382.
- S3. Dartnall, H.J.A. (1972). Photosensitivity. In *Handbook of Sensory Physiology* (New York: Springer-Verlag), pp. 122–145.
- S4. Baylor, D.A., Lamb, T.D., and Yau, K.W. (1979). The membrane current of single rod outer segments. *J. Physiol.* 288, 589–611. Available at: <http://www.ncbi.nlm.nih.gov/pubmed/112242> [Accessed October 21, 2018].
